# Supplementary material for: An interactive key to Central European species of the Pteromalus albipennis species group and other species of the genus (Hymenoptera: Chalcidoidea: Pteromalidae), with the description of a new species
Source: Biodivers Data J. 2018 Nov 14;(6):e27722. doi: 10.3897/BDJ.6.e27722 (PMC6249333; doi:10.3897/BDJ.6.e27722)
Supplement: Supplementary material 1 — Labelled and measured specimens [file bdj-06-e27722-s001.csv]

Genus	Species	Label type	Label number	ID	Females	Date	Leg	Det	Latitude	Longitude	Country	Region	Community	Location	Altitude	Remarks	Type	Collection	Box	Messung	Picture type
Pteromalus	aartseni															Description in Gijswijt 1972
Pteromalus	achillei	Palbi	646		1	15.07.1996	H. Baur	H. Baur	616.3	129.7	CH	VS	Leuk	Brentjong	950m	Käschern auf Achillea millefolium		NMBE	Reference	NA	Habitus
Pteromalus	achillei	alb	?		26	15.07.1996	H. Baur	H. Baur	616.3	129.7	CH	VS	Leuk	Brentjong	950m			NMBE	?	Lutz Bachelor	Measurement, Detail
Pteromalus	achillei	alb	?		1	14.07.1996	H. Baur	H. Baur	612	128	CH	VS	Leuk	Pfynwald	560m			NMBE	?	Lutz Bachelor	Measurement, Detail
Pteromalus	achillei	alb	?		7	16.08.1996	S. Vidal/H. Baur	H. Baur	625	130	CH	VS	Hohtenn	Ladu	1370m			NMBE	?	Lutz Bachelor	Measurement, Detail
Pteromalus	achillei	alb	?		2	01.08.1982	B. Gustafsson				SE	Smaland	Virserum					NMBE	?	Lutz Bachelor	Measurement, Detail
Pteromalus	achillei	alb	?		2	08.07.1981	L.A. Janzon		59.48333	18.547778	SE	Uppland Ljusterö	Bolby		15m			NMBE	?	Lutz Bachelor	Measurement, Detail
Pteromalus	achillei	alb	?	12H760-4	1	17.07.1982	L.A. Janzon				SE	Stockholm	Gysinge					NMBE	?	Lutz Bachelor	Measurement, Detail
Pteromalus	achillei	alb	81-117		34													NMBE	?	Lutz Bachelor
Pteromalus	albipennis	Palbi	647		1	09.08.1995	C. Denys	H. Baur			DE	Göttingen	Reinshof			Sonchus oleraceus; ex Gallen Tephritis formosa		NMBE	Reference	NA	Habitus
Pteromalus	albipennis	Palbi	001-014, 017-021	220	19	13.09.2013	H. Baur	H. Baur	N46.97688	E7.43078	CH	BE	Bremgarten	Stuckishaus	534m			NMBE		Schilling 2014	Measurement, Detail
Pteromalus	albipennis	Palbi	016, 022-030	215	10	13.09.2013	H. Baur	H. Baur	N46.97708	E7.43099	CH	BE	Bremgarten	Stuckishaus	538m			NMBE		Schilling 2014	Measurement, Detail
Pteromalus	altus	Palbi	648		1	27.05.1992	H. Baur	H. Baur	608.1	221.3	CH	BE	Utzenstorf	Emme (Damm)	470m			NMBE	Reference	NA	Habitus
Pteromalus	altus	Palbi	273-274		2	27.05.1997	H. Baur	H. Baur	599.4	202.9	CH	BE	Bremgarten	Hoger	550m			NMBE		Fabian Klimmek	Measurement, Detail
Pteromalus	ametrus	NHMUK 0107493	44		2	09.05.1980	M. de V. Graham	M. de V. Graham			POR	Madeira	Sao Martinho				Paratype	London		Fabian Klimmek	Measurement, Detail, Habitus
Pteromalus	ametrus	NHMUK 0107493	45-46+49		3	xx.8.1982	M. de V. Graham	H. Baur			POR	Madeira		nr. Lago do Santo da Serra/3km E of Poiso				London		Fabian Klimmek	Measurement, Detail, Habitus
Pteromalus	bedeguaris	Palbi	278	CP-1	1	30.05.2002	E. Rakhshani	H. Baur			IRAN		Tehran	Chalous Road		ex Rosa canina L. gall on Diplolepis sp.		NMBE		Fabian Klimmek	Measurement, Detail
Pteromalus	bedeguaris	Palbi	279	AP-1	1	22.05.2002	E. Rakhshani	H. Baur			IRAN		Tehran	Aghasht		ex Rosa canina L. gall on Diplolepis sp.		NMBE		Fabian Klimmek	Measurement, Detail
Pteromalus	bedeguaris	Palbi	649		1	09.04.1995	H. Baur	H. Baur	571.6	108.0	CH	VS	Fully	Les Folatères	620m	ex galls of Diplolepis sp. on Rosa sp.		NMBE	Reference	NA	Habitus
Pteromalus	bedeguaris	Palbi	275-277		3	09.04.1995	H. Baur	H. Baur	571.6	108.0	CH	VS	Fully	Les Folatères	620m	ex galls of Diplolepis sp. on Rosa sp.		NMBE		Fabian Klimmek	Measurement, Detail
Pteromalus	berylli	NHMUK 0107493	18	B.M. TYPE HYM 5.3373	1			M. de V. Graham									Lectotype	London			Detail, Habitus
Pteromalus	berylli	NHMUK 0107493	54		1	08.06.1958	M. de V. Graham	H. Baur			GB	Oxfordshire	Lewknor.					London		Fabian Klimmek	Measurement, Detail, Habitus
Pteromalus	berylli	NHMUK 0107493	56		1	28.06.1966	M. de V. Graham	H. Baur			GB	Middlesex	Southgate			Oakwood Park		London		Fabian Klimmek	Measurement, Detail, Habitus
Pteromalus	bifoveolatus	Palbi	433	FF20	1	07.07.1993	B. Wermelinger	H. Baur	756.7	203.0	CH	SG	Pfäfers	Bläserberg	1450m			NMBE		Fabian Klimmek	Measurement, Detail
Pteromalus	bifoveolatus	Palbi	434	FF20	1	22.09.1993	B. Wermelinger	H. Baur	756.7	203.0	CH	SG	Pfäfers	Bläserberg	1450m			NMBE		Fabian Klimmek	Measurement, Detail
Pteromalus	bifoveolatus	Baur	2521		1	05.06.1996	H. Baur	H. Baur	617.3	150.5	CH	BE	Kandersteg	Höh	1330m			NMBE	Reference	NA	Habitus
Pteromalus	bifoveolatus	Palbi	431-432	No. 676	2	02.08.2003	H. Baur	H. Baur	623.9	139.55	CH	VS	Kippel	Zend	2100m			NMBE		Fabian Klimmek	Measurement, Detail
Pteromalus	brachygaster	Palbi	651		1	06.09.1991	M. J. Gijswijt	M. J. Gijswijt			FR		Vassieux en V.		1440m	inflorescence Artemisia absinthium		NMBE	Reference	NA	Habitus
Pteromalus	brachygaster	Palbi	435-436	2012.217	2	09.07.2012	H. Baur	H. Baur	46.14366	6.796064	CH	VS	Champéry	Col de Bretolet	1916m	Fettwiese		NMBE		Fabian Klimmek	Measurement, Detail
Pteromalus	briani	Baur	2129		1	28.02.2004	J. Grosjean	H. Baur	594.95	196.65	CH	BE	Köniz	Niederwangen (Unterführung)	570m	ex pupa Vanessa atalanta(L.)(Nymphalidae) e.p. 16.3.2004	Holotype	NMBE		Baur 2015	Measurement, Detail, Habitus
Pteromalus	briani	Baur	2423-2426		4	xx.05.2008	R. Schnidrig	H. Baur	46.6132	7.6854	CH	BE	Reichenbach	Kein	560m	ex pupa Aglais urticae L. Lepidoptera, Nymphalidae; WGS84	Paratype	NMBE		Baur 2015	Measurement, Detail
Pteromalus	briani	Baur	2554-2555, 2408-2409, 2414, 2416-2418, 2420-2422		11	28.02.2004	J. Grosjean	H. Baur	594.95	196.65	CH	BE	Köniz	Niederwangen (Unterführung)	570m	ex pupa Vanessa atalanta(L.)(Nymphalidae) e.p. 16.3.2004	Paratype	NMBE		Baur 2015	Measurement, Detail
Pteromalus	capito	Palbi	634	2016.047	1	21.07.2016	H. Baur	H. Baur	46.456363	8.796262	CH	TI	Faido	Garlengo	1402m	Sumpfwiese, reared from Crepis paludosa, Asteraceae		NMBE		Fabian Klimmek	Measurement, Detail
Pteromalus	capito	Palbi	624-625	2015.147	2	03.08.2015	H. Baur	H. Baur	46.143445	6.794963	CH	VS	Champéry	Col de Bretolet	1948m	Alpine Wiese		NMBE		Fabian Klimmek	Measurement, Detail, Habitus
Pteromalus	capito	Palbi	620-621	2015.148	2	03.08.2015	H. Baur	H. Baur	46.143853	6.795059	CH	VS	Champéry	Col de Bretolet	1960m	Alpine Wiese		NMBE		Fabian Klimmek	Measurement, Detail
Pteromalus	capito	Palbi	622-623	2015.149	2	03.08.2015	H. Baur	H. Baur	46.144322	6.794976	CH	VS	Champéry	Col de Bretolet	1962m	Alpine Wiese		NMBE		Fabian Klimmek	Measurement, Detail
Pteromalus	capito	Palbi	626-627	2015.146	2	03.08.2015	H. Baur	H. Baur	46.143652	6.795199	CH	VS	Champéry	Col de Bretolet	1958m	Alpine Wiese		NMBE		Fabian Klimmek	Measurement, Detail
Pteromalus	capito	Palbi	628-629	2015.144	2	03.08.2015	H. Baur	H. Baur	46.143882	6.795086	CH	VS	Champéry	Col de Bretolet	1961m	Alpine Wiese		NMBE		Fabian Klimmek	Measurement, Detail
Pteromalus	capito	Palbi	630-631	2015.143	2	03.08.2015	H. Baur	H. Baur	46.144121	6.794942	CH	VS	Champéry	Col de Bretolet	1960m	Alpine Wiese		NMBE		Fabian Klimmek	Measurement, Detail
Pteromalus	capito	Palbi	632-633	2015.141	2	03.08.2015	H. Baur	H. Baur	46.14371	6.795148	CH	VS	Champéry	Col de Bretolet	1951m	Alpine Wiese		NMBE		Fabian Klimmek	Measurement, Detail
Pteromalus	cardui	Palbi	443		1	08.11.1995	S. Vidal	H. Baur			FR	Bretagne	Guitté			ex Cent. nigra; ex U. 4fasciata/Ch. jacea		NMBE		Fabian Klimmek	Measurement, Detail
Pteromalus	cardui	Palbi	444		1	04.09.1994	C. Denys	H. Baur			DE	Deister-Süd	Bad Münder			ex fl.-heads Centaurea jaceana		NMBE		Fabian Klimmek	Measurement, Detail
Pteromalus	cardui	Palbi	652		1	07.09.1992	H. Baur	H. Baur	571.2	108.35	CH	VS	Dorénaz	Rhôneufer	460m			NMBE		NA	Habitus
Pteromalus	cardui	Palbi	437-442		6	07.09.1992	H. Baur	Askew/Baur	571.2	108.35	CH	VS	Dorénaz	Rhôneufer	460m			NMBE		Fabian Klimmek	Measurement, Detail
Pteromalus	caudiger	Palbi	653		1	21.08.1993	H. Baur	H. Baur	643.3	133.2	CH	VS	Bitsch	Schwarzes-Flesch	1620m	on flower heads of Arctium sp.		NMBE	Reference	NA	Habitus
Pteromalus	caudiger	Palbi	445-447		3	26.08.2000	H. Baur	H. Baur	821.8	189.8	CH	GR	Sent	Flüs	1750m			NMBE		Fabian Klimmek	Measurement, Detail
Pteromalus	caudiger	Palbi	635-637		3	21.08.1993	H. Baur	H. Baur	643.3	133.2	CH	VS	Bitsch	Schwarzes-Flesch	1620m	ex flower heads of Arctium sp.		NMBE		Fabian Klimmek	Measurement, Detail
Pteromalus	caudiger	Palbi	638-640		3	12.7-8.8.1995	Koch	S. Vidal			DE	Eifel	Mühlenbach	Lissendorf		Kohldistelwiese, Schlupf 27.7-7.8		NMBE		Fabian Klimmek	Measurement, Detail
Pteromalus	chlorospilus	Palbi	448		1	13.07.1994	H. Baur	H. Baur			MA	Haut Atlas	Tizi-n-Tichka		2260m			NMBE		Fabian Klimmek	Measurement, Detail
Pteromalus	chlorospilus	Palbi	641	216	1	13.09.2013	H. Baur	H. Baur	N46.97696	E7.43046	CH	BE	Bremgarten	Hoger	541m	mainly on Centaurea jacea, Asteraceae		NMBE		Fabian Klimmek	Measurement, Detail
Pteromalus	chlorospilus	Palbi	655		1	16.07.1996	H. Baur	H. Baur	717.4	85.4	CH	TI	Meride	SSE M. San Giorgio	1020m			NMBE	Reference	NA	Habitus
Pteromalus	chrysos	Palbi	449	No. 676	1	02.08.2003	H. Baur	H. Baur	623.9	139.55	CH	VS	Kippel	Zend	2100m			NMBE		Fabian Klimmek	Measurement, Detail
Pteromalus	chrysos	Palbi	450		1	05.11.1973	A.C.&W.N. Ellis	Gijswijt			GR	Lesbos	Vigla	5km WNW v ándissa				NMBE		Fabian Klimmek	Measurement, Detail
Pteromalus	chrysos	Palbi	656		1	02.10.1995	H. Baur	H. Baur	624.7	130.2	CH	VS	Hohtenn	Kreuz	1150m			NMBE	Reference	NA	Habitus
Pteromalus	cingulipes	Palbi	658	Serie 33 #668, P. egregius	1	16.05.1992	Stickroth	H. Baur			FR	Herault	Bouzigues			ex Podosp. lanciolat. HEAD, ex ? Tephritis pulchra; em. 1.6.1992 Massenzucht		NMBE	Reference	NA	Habitus
Pteromalus	cingulipes	Palbi	031-033, 038-063	206, 208, 215, 220, P. egregius	27	13.09.2013	H. Baur	H. Baur	N46.97699	E7.43099	CH	BE	Bremgarten	Stuckishaus	540m			NMBE		Schilling 2014	Measurement, Detail
Pteromalus	cingulipes	Palbi	034-037	216, P. egregius	4	13.09.2013	H. Baur	H. Baur	N46.97696	E7.43046	CH	BE	Bremgarten	Hoger	541m			NMBE		Schilling 2014	Measurement, Detail
Pteromalus	conformis			Type HYM: 1256	1	29.08.1956	M. de V. Graham	M. de V. Graham			GB	Oxfordshire		Otmoor			Holotype	Oxford		NA	Detail, Habitus
Pteromalus	conformis	Palbi	691		1	26.07.1964	V. Delucchi	H. Baur			CH	ZH		Türlersee		coll. V. Delucchi, labelled S. Bieri		NMBE	Reference	Fabian Klimmek	Measurement, Detail, Habitus
Pteromalus	conformis	Palbi	692		1	01.08.1958	V. Delucchi	H. Baur			CH	TI	Arogno			ETH		NMBE	Reference	Fabian Klimmek	Measurement, Detail, Habitus
Pteromalus	conformis	Palbi	693		1	15.08.1992	H. Baur	H. Baur	591.0	226.7	CH	BE	Vauffelin	Pâturage de Droit	720m	(Weide, Laubgehölze); P. ?artemisiae Fö. det. H. Baur 1993		NMBE	Reference	Fabian Klimmek	Measurement, Detail, Habitus
Pteromalus	costulata	Palbi	451	2012.113	1	27.05.2012	H. Baur	H. Baur	44.2607	6.9060666	FR	Alpes-Maritimes	St-Etienne	Ublan W	1440m	Trockene Mähwiese		NMBE		Fabian Klimmek	Measurement, Detail
Pteromalus	costulata	Palbi	452	2012.096	1	24.06.2012	H. Baur	H. Baur	44.26616	6.901866	FR	Alpes-Maritimes	St-Etienne	Col d'Anelle	1699m	Trockenrasen		NMBE		Fabian Klimmek	Measurement, Detail
Pteromalus	costulata	Palbi	453	2012.144	1	29.06.2012	H. Baur	H. Baur	44.2786111	6.88000	FR	Alpes-Maritimes	St-Dalmas-le-Selvage		1600m	Wiese		NMBE		Fabian Klimmek	Measurement, Detail
Pteromalus	costulata	Palbi	657		1	16.-26.5.1990	M. J. Gijswijt	M. J. Gijswijt			ES	Almeria	Gergal			Tryp. gall on Helichrysium serotinum	Paratype	NMBE		NA	Habitus
Pteromalus	crassinervis	Palbi	454	No. 677	1	02.08.2003	H. Baur	H. Baur	623.55	138.7	CH	VS	Ferden	Torbu	2010m			NMBE		Fabian Klimmek	Measurement, Detail
Pteromalus	crassinervis	Palbi	455	No. 676	1	02.08.2003	H. Baur	H. Baur	623.9	139.55	CH	VS	Kippel	Zend	2100m			NMBE		Fabian Klimmek	Measurement, Detail
Pteromalus	crassinervis	Palbi	456		1	29.06.2003	H. Baur	H. Baur	574.4	126.4	CH	VS	Gryon	Frience	1550m			NMBE		Fabian Klimmek	Measurement, Detail
Pteromalus	crassinervis			MZLU 2016 179	1												Lectotype	NMBE		Fabian Klimmek	Habitus
Pteromalus	cyniphidis	Palbi	457	2014.174	1	03.08.2014	H. Baur	F.Klimmek	55.1638	10.94183	DK	Syddanmark	Langeland	Hov N	1m	Trockenwiese		NMBE		Fabian Klimmek	Measurement, Detail
Pteromalus	cyniphidis	Palbi	458	2014.175	1	04.08.2014	H. Baur	F.Klimmek	54.86635	10.75231	DK	Syddanmark	Langeland	Vindeby N	18m	Schafweide		NMBE		Fabian Klimmek	Measurement, Detail
Pteromalus	elatus	Palbi	659		1	02.10.1995	H. Baur	H. Baur	625.3	130.6	CH	VS	Hohtenn	Ladu	1370m	sweeping on Achillea millefolium		NMBE	Reference	NA	Habitus
Pteromalus	elatus	Palbi	459-464		6	02.10.1995	H. Baur	H. Baur	625.3	130.6	CH	VS	Hohtenn	Ladu	1370m	sweeping on Achillea millefolium		NMBE		Fabian Klimmek	Measurement, Detail
Pteromalus	elatus	Palbi	465-466	No. 677	2	02.08.2003	H. Baur	H. Baur	623.55	138.7	CH	VS	Ferden	Torbu	2010m			NMBE		Fabian Klimmek	Measurement, Detail
Pteromalus	elatus	Palbi	467-468	No. 671	2	30.07.2003	H. Baur	H. Baur	550.3	110.3	CH	VS	Champéry	Col de Bretolet	1900m			NMBE		Fabian Klimmek	Measurement, Detail
Pteromalus	elevatus	Palbi	475		1	27.07.1996	H. Baur	H. Baur	571.6	108.0	CH	VS	Fully	Les Folatères	620m			NMBE		Fabian Klimmek	Measurement, Detail
Pteromalus	elevatus	Palbi	660		1	09.06.1992	H. Baur	H. Baur	602.9	157.1	CH	BE	Diemtigen	1 km sw Grimmialp	1240m			NMBE	Reference	NA	Habitus
Pteromalus	elevatus	Palbi	469-472		4	08.11.1995	S. Vidal	H. Baur			FR	Bretagne	Guitté			ex Cent. nigra; ex U. 4.fasciata/Ch. jacea		NMBE		Fabian Klimmek	Measurement, Detail
Pteromalus	elevatus	Palbi	473-474		2	11.02.1997	H. Baur	H. Baur	711.5	91.5	CH	TI	Monte Caslano		550m	ex Centaurea sp. e.p. iii./iv. 1997; Host: Urophora cf. cuspidata		NMBE		Fabian Klimmek	Measurement, Detail
Pteromalus	elevatus	Palbi	476-478		3	xx.08.1995	C. Denys	H. Baur			DE	Göttingen	Reinshof			ex Tephritis conura Cirsium oleraceum		NMBE		Fabian Klimmek	Measurement, Detail
Pteromalus	eudecipiens	Palbi	482	No. 672	1	31.07.2003	H. Baur	H. Baur	630.6	118.1	CH	VS	Embd	Kalpetran	945m			NMBE		Fabian Klimmek	Measurement, Detail
Pteromalus	eudecipiens	Palbi	483		1	30.07.1997	H. Baur	H. Baur	717.1	86.6	CH	TI	Meride	San Giorgio, Forello	1030m			NMBE		Fabian Klimmek	Measurement, Detail
Pteromalus	eudecipiens	Palbi	484		1	13.07.1994	H. Baur	H. Baur			MA	Haut Atlas	Tizi-n-Tichka		2260m			NMBE		Fabian Klimmek	Measurement, Detail
Pteromalus	eudecipiens	Palbi	485	No. 674	1	01.08.2003	H. Baur	H. Baur	575.4	116.25	CH	VS	Saillon	Euloi	2100m			NMBE		Fabian Klimmek	Measurement, Detail
Pteromalus	eudecipiens	Palbi	486		1	02.10.1995	H. Baur	H. Baur	624.7	130.2	CH	VS	Hohtenn	Kreuz	1150m			NMBE		Fabian Klimmek	Measurement, Detail
Pteromalus	eudecipiens	Palbi	661	Messung H. Baur 173	1	09.09.1969	M. de V. Graham	H. Baur			GB	Middlesex	Southgate					NMBE	Reference	NA	Habitus
Pteromalus	eudecipiens	Palbi	479-481		3	17.08.1992	H. Baur	H. Baur	643.3	133.25	CH	VS	Bitsch	Schwarzes-Flesch	1620m	Felsenheide		NMBE		Fabian Klimmek	Measurement, Detail
Pteromalus	hieracii	Palbi	487	2014.159	1	31.07.2014	H. Baur	F.Klimmek			DK	Syddanmark	Langeland	Bagenkog	18m	Weide		NMBE		Fabian Klimmek	Measurement, Detail
Pteromalus	hieracii			MZLU 2016 178	1												Lectotype	Lund		Fabian Klimmek	Habitus
Pteromalus	inclytus	Palbi	662		1	15.07.1996	H. Baur	H. Baur	616.3	129.7	CH	VS	Leuk	Brentjong	950m	Käschern auf Achillea millefolium		NMBE	Reference	NA	Habitus
Pteromalus	inclytus	Palbi		2014.111	4	16.07.2014	C. Praz, H. Baur	H. Baur	N46.32756772	E7.72226	CH	VS	Gampel-Bratsch	Jeizinen	1540m			NMBE	5060	Maletti Bachelor	Measurement, Detail
Pteromalus	inclytus	Palbi		2014.114	6	17.07.2014	M. Neumann, H. Baur	H. Baur	N46.32768772	E7.72413	CH	VS	Gampel-Bratsch	Jeizinen	1548m			NMBE	5060	Maletti Bachelor	Measurement, Detail
Pteromalus	inclytus	Palbi		2014.116	4	17.07.2014	M. Neumann, H. Baur	H. Baur	N46.32768772	E7.72414	CH	VS	Gampel-Bratsch	Jeizinen	1551m			NMBE	5060	Maletti Bachelor	Measurement, Detail
Pteromalus	inclytus	Palbi		2015.070	2	10.07.2015	H. Baur	H. Baur	N46.32669773	E7.73344	CH	VS	Gampel-Bratsch	Oberi Zälg	1361m			NMBE	5060	Maletti Bachelor	Measurement, Detail
Pteromalus	inclytus	Palbi		2015.071	5	10.07.2015	H. Baur	H. Baur	N46.32697734	E7.734124	CH	VS	Gampel-Bratsch	Oberi Zälg	1362m			NMBE	5060	Maletti Bachelor	Measurement, Detail
Pteromalus	inclytus	Palbi		2015.095	1	15.07.2015	H. Baur	H. Baur	N463278773	E7.734158	CH	VS	Gampel-Bratsch	Oberi Zälg	1332m			NMBE	5060	Maletti Bachelor	Measurement, Detail
Pteromalus	inclytus	Palbi		2015.096	1	15.07.2015	H. Baur	H. Baur	N46.32671773	E7.733437	CH	VS	Gampel-Bratsch	Oberi Zälg	1364m			NMBE	5060	Maletti Bachelor	Measurement, Detail
Pteromalus	inclytus	Palbi		2015.306	4	15.07.2015	S. Maletti	H. Baur	N46.32672773	E7.733512	CH	VS	Gampel-Bratsch	Oberi Zälg	1367m			NMBE	5060	Maletti Bachelor	Measurement, Detail
Pteromalus	inclytus	Palbi		2015.097	1	15.07.2015	H. Baur	H. Baur	N46.32697773	E7.733931	CH	VS	Gampel-Bratsch	Oberi Zälg	1364m			NMBE	5060	Maletti Bachelor	Measurement, Detail
Pteromalus	inclytus	Palbi		2015.098	1	15.07.2015	H. Baur	H. Baur	N46.32695773	E7.73459	CH	VS	Gampel-Bratsch	Oberi Zälg	1368m			NMBE	5060	Maletti Bachelor	Measurement, Detail
Pteromalus	inclytus	Palbi		2015.313	1	15.07.2015	S. Maletti	H. Baur	N46.32916773	E7.728851	CH	VS	Gampel-Bratsch	Wildi E	1577m			NMBE	5060	Maletti Bachelor	Measurement, Detail
Pteromalus	integer	NHMUK	010749315	B.M TYPE HYM. 5.720	1			M. de V. Graham			POR	Madeira	Porto Santo				Lectotype	London			Detail, Habitus
Pteromalus	integer	NHMUK	010834595		1	23.06.1982	M. de V. Graham	M. de V. Graham			POR	Madeira	Curral dos Romeiros (1)					London		Fabian Klimmek	Measurement
Pteromalus	integer	NHMUK	010834597		1	21.05.1980					POR	Madeira	S. Martinho					London		Fabian Klimmek	Measurement
Pteromalus	integer	NHMUK	010834600		1	05.08.1985	M. de V. Graham	M. de V. Graham			POR	Madeira	Joao do Prado	3 km East				London		Fabian Klimmek	Measurement
Pteromalus	integer	NHMUK	010834602		1	01.08.1982	M. de V. Graham	M. de V. Graham			POR	Madeira	nr. Lagoa do Santo da Serra					London		Fabian Klimmek	Measurement, Detail, Habitus
Pteromalus	integer	NHMUK	010749478		1	18.05.1980					POR	Madeira	Pous. dos Vinhaticos					London		Fabian Klimmek	Measurement
Pteromalus	intermedius	Palbi	495	No. 671	1	30.07.2003	H. Baur	H. Baur	550.3	110.3	CH	VS	Champéry	Col de Bretolet	1900m			NMBE		Fabian Klimmek	Measurement, Detail
Pteromalus	intermedius	Palbi	664	Messung H. Baur 117	1	25.08.1970	M. de V. Graham	H. Baur			GB	Middlesex	Southgate					NMBE	Reference	NA	Habitus
Pteromalus	intermedius	Palbi	496-498		3	16.09.1996	H. Baur	H. Baur	599.4	202.9	CH	BE	Bremgarten	Hoger	550m			NMBE		Fabian Klimmek	Measurement, Detail
Pteromalus	intermedius	Palbi	499-500	216	2	13.09.2013	H. Baur	H. Baur	N46.97696	E7.43046	CH	BE	Bremgarten	Hoger	541m	BC-ZSM-HYM 01772-C12 und C09; mainly on Centaurea jacea, Asteraceae		NMBE		Fabian Klimmek	Measurement, Detail
Pteromalus	intermedius	Palbi	501-502		2	xx.07.1995	C. Denys	H. Baur			DE	Göttingen	Reinshof			ex Tephritis formosa, Sonchus oleraceus		NMBE		Fabian Klimmek	Measurement, Detail
Pteromalus	janstai	Baur	2410		1	15.07.2005	P. Jansta	H. Baur	623.9	139.55	CH	VS	Kippel	Zend	2100m	Alpine Weide	Holotype	NMBE		Baur 2015	Measurement, Detail, Habitus
Pteromalus	janstai	Baur	2412		1	10.08.1998	H. Baur	H. Baur	786.4	146.2	CH	GR	Samedan, Val Roseg	Blais Grand	2100m		Paratype	NMBE		Fabian Klimmek	Measurement, Detail
Pteromalus	lactucae	Baur	1739		1	03.10.1996	S. Vidal	H. Baur			FR		Colliure					NMBE	Reference	NA	Habitus
Pteromalus	lactucae	Baur	1739		1	03.10.1996	S. Vidal	H. Baur			FR		Colliure					NMBE	Reference	Fabian Klimmek	Measurement, Detail
Pteromalus	musaeus	NHMUK 0107493	17	B.M. TYPE HYM 5.3370	1			M. de V. Graham									Lectotype	London			Detail, Habitus
Pteromalus	musaeus	Palbi	503		1	09.06.1993	B. Merz	H. Baur			CH	GR	Rothenbrunnen		600m	ex fl. head Hieracium piloselloides, H: Noeet. bisetosa		NMBE		Fabian Klimmek	Measurement, Detail
Pteromalus	musaeus	Palbi	504	No. 669	1	28.07.2003	H. Baur	H. Baur	44°45.031'	006°48.082'	FR	Haute-Alpes	Chauteau-Ville-Vieille	Sommet Bucher	1900m			NMBE		Fabian Klimmek	Measurement, Detail
Pteromalus	musaeus	Palbi	642		1	10.09.1991	Stickroth	Stickroth			DE	Oberpfalz	Eschenbach	Russweiher		ex Hieracium laevig. HEAD, ex?Noeeta pupillata		NMBE		Fabian Klimmek	Measurement, Detail
Pteromalus	musaeus	Palbi	643		1	18.09.1991	Stickroth	Stickroth			DE		Schrobenhausen			ex Hier. sebaudum (head); em. 8.3.91 ex Noeeta pupillata Fallén		NMBE		Fabian Klimmek	Measurement, Detail
Pteromalus	musaeus	Palbi	665		1	29.06.1992	B. Merz	H. Baur			CH	TI	Biasca-Loderio		350m	ex: Hieracium piloselloides H: Noeeta bisetosa		NMBE	Reference	NA	Habitus
Pteromalus	musaeus	Palbi	505-506		2	11.09.1994	Merz&Eggenberger	H. Baur			CH	GR	Ausserferrera					NMBE		Fabian Klimmek	Measurement, Detail
Pteromalus	myopitae	Palbi	666	uppermost specimen	1	27.05.1957	Isaakidès	H. Baur			GR	Kreta				Galles de Myopites s. Inula viscosa		NMBE	Reference	NA	Habitus
Pteromalus	myopitae	Palbi	405-408															NMBE	5060	Cindy Wittmer	Measurement, Detail
Pteromalus	myopitae	Palbi	604-619															NMBE	5060	Cindy Wittmer	Measurement, Detail
Pteromalus	ochrocerus	Palbi	516	29b 1	1	29.08.1987	D. Haefelfinger	H. Baur			CH	VS	Sierre			ex Silene vulgaris ssp. vulgaris em. 3.9.87		NMBE		Fabian Klimmek	Measurement, Detail
Pteromalus	ochrocerus			MZLU 2016 169	1			M. de V. Graham									Lectotype	Lund		Fabian Klimmek	Detail, Habitus
Pteromalus	ochrocerus	Palbi	511-512	No. 672	2	31.07.2003	H. Baur	H. Baur	630.6	118.1	CH	VS	Embd	Kalpetran	945m			NMBE		Fabian Klimmek	Measurement, Detail
Pteromalus	ochrocerus	Palbi	513-515		3	16.08.1996	S. Vidal/H. Baur	H. Baur	625	130	CH	VS	Hohtenn	Ladu	1370m			NMBE		Fabian Klimmek	Measurement, Detail
Pteromalus	parietinae	Palbi	644		1	06.02.1991	B. Merz	H. Baur			CH	BS	Basel-Bachgraben		250m	ex stem Artemisia vulgaris em. 19.3.91		NMBE		Fabian Klimmek	Measurement, Detail
Pteromalus	parietinae	Palbi	667	Messung H. Baur 90	1	14.06.1996	H. Baur	H. Baur	717.2	82.1	CH	TI	Arzo	Cava di Marmo	540m	an Artemisia vulgaris mit Käscher		NMBE	Reference	NA	Habitus
Pteromalus	parietinae	Palbi	517-525		9	15.06.1996	H. Baur	H. Baur	717.2	82.1	CH	TI	Arzo	Cava di Marmo	540m	an Artemisia vulgaris mit Käscher		NMBE		Fabian Klimmek	Measurement, Detail
Pteromalus	patro	Palbi	526		1	31.08.1989	B. Merz	M.J. Gijswijt			CH	SH	Schaffhausen		500m	Terellia winthemi in Carduus crispus		NMBE		Fabian Klimmek	Measurement, Detail
Pteromalus	patro	Palbi	645		1	31.08.1999	B. Merz	S. Vidal			CH	SH	Schaffhausen		500m	ex Carduus crispus, H: Terellia winthemi		NMBE		Fabian Klimmek	Measurement, Detail
Pteromalus	patro	Palbi	668	ETH; Messung H. Baur 103	1	31.08.1989	B. Merz	M.J. Gijswijt			CH	SH	Schaffhausen		580m	Terellia winthemi in Carduus crispus		NMBE	Reference	NA	Habitus
Pteromalus	pilosellae			Mält 1,2,4-6	5		L-A. Janzon	H. Baur			S						Paratype	Stockholm	Red	Fabian Klimmek	Measurement, Detail, Habitus
Pteromalus	platyphilus	Palbi	527		1	07.06.2004	H. Baur	H. Baur	50°02.630'N	014°21.537'E	CZ	Bohemia	Praha-Butovice	Prokopskè udoli	100m	Magerwiese		NMBE		Fabian Klimmek	Measurement, Detail
Pteromalus	platyphilus	Baur	2527		1	13.07.1994	H. Baur	Z. Boucek			MA	Haut-Atlas	Tizi-n-Tichka		2260m			NMBE	Reference	NA	Habitus
Pteromalus	puparum	Palbi	531		1	02.10.1991	H. Baur	H. Baur			IT	Novara	Lago d'Orta	Pratolungo	480m			NMBE		Fabian Klimmek	Measurement, Detail
Pteromalus	puparum	Palbi	532		1	17.08.1992	H. Baur	H. Baur	643.3	133.25	CH	VS	Bitsch	Schwarzes-Flesch	1620m	(Felsenheide)		NMBE		Fabian Klimmek	Measurement, Detail
Pteromalus	puparum	Baur	2549		1	14.08.2006	J. Gnägi	H. Baur			CH	BE	Meikirch			ex pupa Papilio machaon L. (Lep.)		NMBE	Reference	NA	Habitus
Pteromalus	puparum	Palbi	528-530		3	16.05.1997	H. Baur	H. Baur			GR	Samos	Pythagorion		20m	an Ruinenmauer		NMBE		Fabian Klimmek	Measurement, Detail
Pteromalus	scandiae			Type HYM: 1254	1	27.07.1959	M. de V. Graham	M. de V. Graham			SE	Falsterbo					Holotype	Oxford		NA	Detail
Pteromalus	scandiae	Palbi	425-427	SCA1	3	21.09.1994	C. Denys	H. Baur			DE		Beltringharder Koog			Campiglossa absinthii, A. maritima		NMBE	Reference	Fabian Klimmek	Measurement, Detail, Measurement
Pteromalus	semotus	Palbi	535	17715a	1	09.02.2009	A. Ribes	H. Baur			ES	Pina de Ebro	Zaragoza	30T YL39		ex. Juniperusphoenicea fruits em.16-4-2009		NMBE		Fabian Klimmek	Measurement, Detail
Pteromalus	semotus	Palbi	536		1	12.08.1997	H. Baur	H. Baur	592	164	CH	BE	Boltigen	Vordere Reidigen	1420m			NMBE		Fabian Klimmek	Measurement, Detail
Pteromalus	semotus	Palbi	669		1	19.07.1991		H. Baur			RU	North Caucasus	Pyatigorsk			ex Yponomeuta maline Host plant: Malus domestica		NMBE	Reference	NA	Habitus
Pteromalus	semotus	Palbi	533-534		2	9.-14.ix.1995	A. Cazzuoli	H. Baur			IT	Emilia Romagna	Mirandola		20m			NMBE		Fabian Klimmek	Measurement, Detail
Pteromalus	sequester	Palbi	539		1	17.08.1992	H. Baur	H. Baur	643.3	133.25	CH	VS	Bitsch	Schwarzes-Flesch	1620m	(Felsenheide)		NMBE		Fabian Klimmek	Measurement, Detail
Pteromalus	sequester	Palbi	670		1	4.-11.2.1961		H. Baur							1850m	Talasol?aue RiF		NMBE		NA	Habitus
Pteromalus	sequester	Palbi	537-538		2	12.08.1997	H. Baur	H. Baur	592	164	CH	BE	Boltigen	Vordere Reidigen	1420m			NMBE		Fabian Klimmek	Measurement, Detail
Pteromalus	sequester	Palbi	540-541		2	16.08.1996	S. Vidal/H. Baur	H. Baur	625	130	CH	VS	Hohtenn	Ladu	1370m			NMBE		Fabian Klimmek	Measurement, Detail
Pteromalus	solidaginis	Palbi	542-544		3	15.IX.1996	Merz&Eggenberger	H. Baur			CH	BE	Magglingen		1080m			NMBE		Fabian Klimmek	Measurement, Detail
Pteromalus	solidaginis	Palbi	671		1	27.08.1990	M.J. Gijswijt	Graham & Gijswijt			FR	Drôme	Séderon	Col de l'homme mort		swept from Solidago virgaurea	Paratype	NMBE	Reference	NA	Habitus
Pteromalus	speculifer	NHMUK 107494	24+26		2	21.05.1980		H. Baur			POR	Madeira	Sao Martinho					London		Fabian Klimmek	Measurement, Detail, Habitus
Pteromalus	speculifer	NHMUK 107494	28-30		3	21.07.1982	M. de V. Graham	H. Baur			POR	Madeira	Sao Martinho					London		Fabian Klimmek	Measurement, Detail, Habitus
Pteromalus	temporalis	Palbi	551		1	26.08.2000	H. Baur	H. Baur	821.8	189.8	CH	GR	Sent	Flüs	1750m			NMBE		Fabian Klimmek	Measurement, Detail
Pteromalus	temporalis	Palbi	552		1	13.07.1995	H. Baur	H. Baur			FR	Lozère	Camprieu	Col de Faubel	1180m			NMBE		Fabian Klimmek	Measurement, Detail
Pteromalus	temporalis	Palbi	553	BC-ZSM-HYM-01772-A12	1	13.09.2013	H. Baur	H. Baur	N46.97688	E7.43078	CH	BE	Bremgarten	Stuckishaus	534m	mainly on Centaurea jacea, Asteraceae		NMBE		Fabian Klimmek	Measurement, Detail
Pteromalus	temporalis	Palbi	545-550		6	13.07.1994	H. Baur	H. Baur			MA	Haut Atlas	Tizi-n-Tichka		2260m			NMBE		Fabian Klimmek	Measurement, Detail
Pteromalus	temporalis	Palbi	672		1	13.07.1994	H. Baur	H. Baur			MA	Haut Atlas	Tizi-n-Tichka		2260m			NMBE	Reference	NA	Habitus
Pteromalus	tibiellus			82; 197 551	1			M. de V. Graham									Holotype	Lund		Fabian Klimmek	Measurement, Detail, Habitus
Pteromalus	tripolii	Palbi	554	FF18	1	26.07.1994	B. Wermelinger	H. Baur	756.7	203.0	CH	SG	Pfäfers	Bläserberg	1450m			NMBE		Fabian Klimmek	Measurement, Detail
Pteromalus	tripolii	Palbi	555	FF20	1	21.07.1993	B. Wermelinger	H. Baur	756.7	203.0	CH	SG	Pfäfers	Bläserberg	1450m			NMBE		Fabian Klimmek	Measurement, Detail
Pteromalus	tripolii	Palbi	556		1	21 IX 1972	B.v.Aartsen	M.J. Gijswijt			NL		Zuid-Sloe			(schorren)		NMBE		Fabian Klimmek	Measurement, Detail
Pteromalus	tripolii	Palbi	557-558		2	04.08.1993	C. Denys	H. Baur			DE		Beltringharder Koog					NMBE		Fabian Klimmek	Measurement, Detail
Pteromalus	tripolii	Palbi	673		1	04.02.1993	C. Denys	S. Vidal			DE		Beltringharder Koog					NMBE	Reference	NA	Habitus
Pteromalus	vibulenus	Palbi	559		1	30.06.1992	H. Baur	H. Baur	625.65	130.75	CH	VS	Hohtenn	ne Hohtenn	1460m	(Subalpine Weide)		NMBE		Fabian Klimmek	Measurement, Detail
Pteromalus	vibulenus	Palbi	560		1	02.10.1991	H. Baur	H. Baur			IT	Novara	Lago d'Orta	Pratolungo	480m			NMBE		Fabian Klimmek	Measurement, Detail
Pteromalus	vibulenus	Palbi	561-562		2	16.ix.1996	H. Baur	H. Baur	599.4	202.9	CH	BE	Bremgarten	Hoger	550m			NMBE		Fabian Klimmek	Measurement, Detail
Pteromalus	vibulenus	Palbi	674		1	07.09.1992	H. Baur	H. Baur	571.2	108.35	CH	VS	Dorénaz	Rhôneufer	460m			NMBE	Reference	NA	Habitus
Pteromalus	vopiscus	Palbi	567		1	22.06.2003	H. Baur	H. Baur	576.9	112.45	CH	VS	Fully	Chiboz d'en Bas	1220m			NMBE		Fabian Klimmek	Measurement, Detail
Pteromalus	vopiscus	Palbi	563-564		2	16.viii.1996	S. Vidal/H. Baur	H. Baur	625	130	CH	VS	Hohtenn	Ladu	1370m			NMBE		Fabian Klimmek	Measurement, Detail
Pteromalus	vopiscus	Palbi	565-566		2	17.08.1992	H. Baur	H. Baur	643.3	133.25	CH	VS	Bitsch	Schwarzes-Flesch	1620m	(Felsenheide)		NMBE		Fabian Klimmek	Measurement, Detail
Pteromalus	vopiscus	Baur	2541		1	23.09.1998	H. Baur	H. Baur	717.4	85.4	CH	TI	Meride	SSE M. San Giorgio	1020m			NMBE	Reference	NA	Habitus
Pteromalus
