# Supplementary material for: An interactive key to Central European species of the Pteromalus albipennis species group and other species of the genus (Hymenoptera: Chalcidoidea: Pteromalidae), with the description of a new species
Source: Biodivers Data J. 2018 Nov 14;(6):e27722. doi: 10.3897/BDJ.6.e27722 (PMC6249333; doi:10.3897/BDJ.6.e27722)
Supplement: Supplementary material 6 — Rearings overview [file bdj-06-e27722-s006.csv]

					Collection date														Hatching date
Code	Country	Province	Municipality	Locality	Day	Month	Year	Plant species	Diptera	Hymenoptera Total	Pteromalus	P. albipennis B	P. caudiger	Pteromalidae	Chalcidoidea	Ichneumonidae	Hymenoptera	Lepidoptera	Date 1	Date 2	Date 3	Date 4	Date 5	Date 6	Date 7	Date 8	Date 9	Date 10	Date 11	Date 12	Date 13	Date 14	Date 15	Date 16	Date 17	Date 18	Date 19	Date 20	Date 21	Date 22	Date 23	Date 24	Date 25	Date 26	Date 27	Date 28	Date 29	Date 30	Date 31
2016.609	CH	Wallis	Gampel-Bratsch	Oberi Matte	07	07	2016	Crepis pyrenaica	13	33	9	1		1	21		1		13.07.2016	14.07.2016	15.07.2016	18.07.2016	21.07.2016	22.07.2016	25.07.2016	27.07.2016
2016.615	CH	Bern	Kandersteg	Heimritz	08	07	2016	Leontodon hispidus L. s.str.	18	11	4				7				15.07.2016	18.07.2016	21.07.2016	22.07.2016
2016.616	CH	Bern	Kandersteg	Heimritz	08	07	2016	Leontodon hispidus ssp. danubialis	19	4	4								15.07.2016	18.07.2016	21.07.2016	22.07.2016
2016.042	CH	Tessin	Bedretto	All'Acqua, W	19	07	2016	Crepis paludosa	38	68	49						19		22.07.2016	25.07.2016	26.07.2016	27.07.2016	28.07.2016	29.07.2016	02.08.2016	03.08.2016	05.08.2016	23.08.2016
2016.043	CH	Tessin	Bedretto	Tre Croci	19	07	2016	Crepis pyrenaica	21	2	2								27.07.2016	28.07.2016	29.07.2016	02.08.2016	03.08.2016	05.08.2016	12.08.2016
2016.044	CH	Tessin	Faido	Bedolina, SE	21	07	2016	Cirsium helenioides	24	22	4		18						22.07.2016	25.07.2016	26.07.2016	27.07.2016	28.07.2016	29.07.2016	02.08.2016	03.08.2016
2016.046	CH	Tessin	Faido	Garlengo	21	07	2016	Cirsium helenioides	19	5	5								25.07.2016	26.07.2016	29.07.2016	02.08.2016	03.08.2016
2016.047	CH	Tessin	Faido	Garlengo	21	07	2016	Crepis paludosa	41	160	144			13			3		22.07.2016	25.07.2016	27.07.2016	28.07.2016	29.07.2016	02.08.2016	03.08.2016	05.08.2016	21.09.2016	27.10.2016
2016.048	CH	Tessin	Faido	Garlengo	21	07	2016	Carduus defloratus L. s.str	9	0									26.07.2016	29.07.2016	03.08.2016
2016.049	CH	Tessin	Airolo	Grasso di Pesciüm	20	07	2016	Arnica montana	16	1	1								28.07.2016	29.07.2016	02.08.2016	03.08.2016	05.08.2016
2016.625	CH	Bern	Bern	Schosshalde	27	07	2016	Centaurea jacea L. s.l.	14	23	19			1	3				02.08.2016	03.08.2016	05.08.2016	10.08.2016	12.08.2016	24.08.2016	17.10.2016	27.10.2016
2016.626	CH	Bern	Bern	Schosshalde	27	07	2016	Cirsium arvense		0
2016.058	CH	Bern	Wohlen b. Bern	Eymatt	27	07	2016	Cirsium oleraceum	17	0									03.08.2016	05.08.2016	12.08.2016
2016.629	CH	Bern	Bolligen	Lutzere	29	07	2016	Cirsium arvense	1	4							4		12.08.2016
2016.630	CH	Bern	Bolligen	Lutzere	29	07	2016	Cirsium oleraceum	19	0									02.08.2016	03.08.2016	05.08.2016	10.08.2016	12.08.2016
2016.631	CH	Bern	Krauchthal	Cholacher	29	07	2016	Achillea millefolium L. s.l.	7	1					1				02.08.2016	03.08.2016	05.08.2016	10.08.2016	12.08.2016
2016.632	CH	Bern	Kernenried	Gemeinewald	29	07	2016	Cirsium oleraceum	4	0									05.08.2015	10.08.2016	12.08.2016
2016.633	CH	Bern	Kernenried	Ischlag	29	07	2016	Centaurea jacea L. s.l.	8	4					1		3		02.08.2016	03.08.2016	05.08.2016	10.08.2016	12.08.2016	15.08.2016
2016.638	IT	Aostatal	Valpelline		08	08	2016	Arctium lappa	2	6					6				21.09.2016
2016.639	IT	Aostatal	Valpelline		08	08	2016	Cirsium arvense	2	4					1		3		19.08.2016	23.08.2016	27.09.2016	24.11.2016
2016.642	IT	Aostatal	Bionaz		09	08	2016	Achillea millefolium L. s.l.		14					14				21.09.2016	28.09.2016
2016.643	IT	Aostatal	Bionaz		09	08	2016	Cirsium eriophorum		2						2			23.08.2016
2016.644	IT	Aostatal	Bionaz		09	08	2016	Cirsium eriophorum	1	0									31.08.2016
2016.649	IT	Aostatal	Gimillan		10	08	2016	Picris hieracioides L. s.l.	10	116	16			99					12.08.2016	15.08.2016	17.08.2016	19.08.2016	23.08.2016	24.08.2016	28.09.2016	16.01.2017
2016.654	CH	Wallis	Leuk	Satellitenbodenstation	16	08	2016	Centaurea scabiosa L. s.l.	12	17				1	14		2		30.08.2016	31.08.2016	02.09.2016	05.09.2016	12.09.2016	16.09.2016	20.09.2016	27.09.2016	29.09.2016	30.09.2016	23.11.2016	13.12.2016	19.12.2016	16.01.2017	31.01.2017	10.02.2017	15.02.2017	21.02.2017	28.02.2017	06.03.2017
2016.655	CH	Wallis	Leuk	Satellitenbodenstation	16	08	2016	Achillea millefolium L. s.l.	20	297	23			70	204				17.08.2016	19.08.2016	23.08.2016	24.08.2016	25.08.2016	29.08.2016	30.08.2016	31.08.2016	02.09.2016	05.09.2016	08.09.2016	22.09.2016	27.09.2016	29.09.2016	03.10.2016	07.10.2016	11.10.2016	13.10.2016	14.10.2016	27.10.2016	01.11.2016	16.11.2016
2016.658	CH	Waadt	Ormont-Dessus	Retaud	17	08	2016	Senecio alpinus	12	12	7			2			3		23.08.2016	24.08.2016	25.08.2016	29.08.2016	31.08.2016
2016.659	CH	Waadt	Ormont-Dessus	Retaud	17	08	2016	Centaurea jacea L. s.l.	3	0									05.09.2016	04.10.2016
2016.660	CH	Waadt	Ormont-Dessus	Retaud	17	08	2016	Senecio alpinus		0
2016.667	CH	Bern	Kandersteg	Heimritz	25	08	2016	Carduus defloratus L. s.l.	15	0	5			23	110		1		29.08.2016	30.08.2016	31.08.2016	02.09.2016	08.09.2016	12.09.2016	13.09.2016	14.09.2016	16.09.2016	19.09.2016	22.09.2016	27.09.2016	28.09.2016	29.09.2016	30.09.2016	03.10.2016	04.10.2016	05.10.2016	06.10.2016	14.10.2016	28.10.2016	07.11.2016	16.11.2016	22.11.2016	30.11.2016	14.12.2016	19.12.2016	16.01.2017
2016.668	CH	Bern	Kandersteg	Heimritz	25	08	2016	Crepis pyrenaica	16	0	1			1				1	31.08.2016	02.09.2016	05.09.2016	08.09.2016	13.09.2016	20.02.2017
2016.671	CH	Bern	Gsteigwiler	Schynige Platte	26	08	2016	Carduus personata	9	0									31.08.2016	02.09.2016	05.09.2016	08.09.2016
2016.674	CH	Bern	Saanen	Hornberg	31	08	2016	Cirsium eriophorum	9	0									20.09.2016	21.09.2016	22.09.2016	03.10.2016	10.10.2016	11.10.2016	30.01.2016
2016.675	CH	Bern	Saanen	Hornberg	31	08	2016	Hieracium murorum	6	13	12						1		02.09.2016	05.09.2016	12.09.2016	13.09.2016	31.10.2016	23.11.2016	28.11.2016
2016.679	CH	Bern	Bern	Zentrum Paul Klee	02	09	2016	Centaurea jacea L. s.l.	9	58	15			1	42				05.09.2016	08.09.2016	12.09.2016	13.09.2016	14.09.2016	16.09.2016	19.09.2016	20.09.2016	21.09.2016	27.09.2016	03.10.2016	04.10.2016	07.10.2016	18.10.2016	01.11.2016	07.11.2016	25.01.2017	06.03.2017
2016.682	CH	Graubünden	Scuol	Ftan Pitschen	06	09	2016	Centaurea scabiosa L. s.l.	16	2	1				1				12.09.2016	19.09.2016	20.09.2016	21.09.2016	22.09.2016	27.09.2016	28.09.2016	10.10.2016	12.10.2016	13.10.2016	14.10.2016	27.10.2016	29.11.2016	05.12.2016	06.01.2017	17.01.2017	07.02.2017	06.03.2017
2016.683	CH	Graubünden	Scuol	Ftan	06	09	2016	Cirsium arvense	3	0									13.09.2016	30.09.2016
2016.685	CH	Graubünden	Scuol	Ftan Nateas	07	09	2016	Centaurea scabiosa L. s.l.	17	0									12.09.2016	13.09.2016	19.09.2016	03.10.2016	10.10.2016	17.10.2016	26.10.2016	31.10.2016	07.12.2016	25.01.2017	07.02.2017	28.02.2017	06.03.2017
2016.686	CH	Graubünden	Scuol	Ftan Nateas	07	09	2016	Carduus defloratus L. s.l.	28	10	2				8				08.09.2016	12.09.2016	13.09.2016	14.09.2016	16.09.2016	19.09.2016	20.09.2016	21.09.2016	27.09.2016	28.09.2016	29.09.2016	28.11.2016
2016.687	CH	Graubünden	Scuol	Ftan Nateas	07	09	2016	Achillea millefolium L. s.l.
2016.688	CH	Bern	Affoltern i. E.	Rämihus	13	09	2016	Leontodon hispidus L. s.l.
2016.689	CH	Bern	Riggisberg	Schwarzhölzli	13	09	2016	Cirsium oleraceum	6										16.09.2016	19.09.2016	20.09.2016	11.10.2016
							2016
							2016
							2016
							2016
							2016
							2016
							2016
							2016
							2016
							2016
							2016
							2016
							2016
							2016
							2016
							2016
							2016
							2016
							2016
							2016
							2016
							2016
							2016
							2016
							2016
							2016
[truncated: 66 more columns]
