# Supplementary material for: An interactive key to Central European species of the Pteromalus albipennis species group and other species of the genus (Hymenoptera: Chalcidoidea: Pteromalidae), with the description of a new species
Source: Biodivers Data J. 2018 Nov 14;(6):e27722. doi: 10.3897/BDJ.6.e27722 (PMC6249333; doi:10.3897/BDJ.6.e27722)
Supplement: Supplementary material 7 — Rearings species list [file bdj-06-e27722-s007.csv]

Code	males	females	sex not determined	Genus	Species	Family	Order	ART_ID_Status	Remarks	Host plant
2016.609			21			Eurytomidae	Chalcidoidea			Crepis pyrenaica
2016.609			1				Chalcidoidea			Crepis pyrenaica
2016.609		2		Pteromalus	albipennis B	Pteromalidae	Chalcidoidea			Crepis pyrenaica
2016.609		1		Pteromalus	intermedius	Pteromalidae	Chalcidoidea			Crepis pyrenaica
2016.609	6			Pteromalus		Pteromalidae	Chalcidoidea			Crepis pyrenaica
2016.609		3		Pteromalus	albipennis A	Pteromalidae	Chalcidoidea			Crepis pyrenaica
2016.609		1		Pteromalus	capitonis	Pteromalidae	Chalcidoidea		used for microtomy	Crepis pyrenaica
2016.609				Tephritis	crepidis	Tephritidae	Diptera			Crepis pyrenaica
2016.615			7			Eurytomidae	Chalcidoidea			Leontodon hispidus L. s.str.
2016.615	3	1		Pteromalus	albipennis B	Pteromalidae	Chalcidoidea			Leontodon hispidus L. s.str.
2016.616	1	3		Pteromalus	albipennis B	Pteromalidae	Chalcidoidea			Leontodon hispidus ssp. danubialis
2016.042	9	10				Braconidae	Ichneumonoidea			Crepis paludosa
2016.042		3		Pteromalus	temporalis	Pteromalidae	Chalcidoidea			Crepis paludosa
2016.042		18		Pteromalus	albipennis B	Pteromalidae	Chalcidoidea			Crepis paludosa
2016.042		1		Pteromalus	intermedius	Pteromalidae	Chalcidoidea			Crepis paludosa
2016.042		6		Pteromalus	elatus	Pteromalidae	Chalcidoidea			Crepis paludosa
2016.043	1	1		Pteromalus	albipennis B	Pteromalidae	Chalcidoidea			Crepis pyrenaica
2016.044	9	13		Pteromalus	caudiger	Pteromalidae	Chalcidoidea			Cirsium helenioides
2016.046	2	3		Pteromalus	caudiger	Pteromalidae	Chalcidoidea			Cirsium helenioides
2016.047			2			Braconidae	Ichneumonoidea			Crepis paludosa
2016.047			1				Ichneumonoidea			Crepis paludosa
2016.047	63			Pteromalus		Pteromalidae	Chalcidoidea			Crepis paludosa
2016.047		23		Pteromalus	elatus	Pteromalidae	Chalcidoidea			Crepis paludosa
2016.047		14		Pteromalus	temporalis	Pteromalidae	Chalcidoidea			Crepis paludosa
2016.047		4		Pteromalus	intermedius	Pteromalidae	Chalcidoidea			Crepis paludosa
2016.047		1		Pteromalus	elatus	Pteromalidae	Chalcidoidea	cf	Hairline broken	Crepis paludosa
2016.047		2		Pteromalus	capitonis	Pteromalidae	Chalcidoidea			Crepis paludosa
2016.047		3		Pteromalus	albipennis A	Pteromalidae	Chalcidoidea			Crepis paludosa
2016.047		46		Pteromalus	albipennis B	Pteromalidae	Chalcidoidea			Crepis paludosa
2016.047				Tephritis	conura	Tephritidae	Diptera			Crepis paludosa
2016.047				Campiglossa	guttella	Tephritidae	Diptera	cf		Crepis paludosa
2016.047				Campiglossa	sp.	Tephritidae	Diptera			Crepis paludosa
2016.049		1		Pteromalus	albipennis B	Pteromalidae	Chalcidoidea			Arnica montana
2016.625	3	4				Eurytomidae	Chalcidoidea			Centaurea jacea
2016.625	14			Pteromalus		Pteromalidae	Chalcidoidea			Centaurea jacea
2016.625		10		Pteromalus	albipennis A	Pteromalidae	Chalcidoidea			Centaurea jacea
2016.625		1		Pteromalus	capitonis	Pteromalidae	Chalcidoidea			Centaurea jacea
2016.625				Acanthiophilus	helianthi	Tephritidae	Diptera			Centaurea jacea
2016.625				Chaetoriella	jaceae	Tephritidae	Diptera			Centaurae jacea
2016.629			4				Ichneumonoidea			Cirsium arvense
2016.631		1					Chalcidoidea			Achillea millefolium
2016.633	1	3				Eurytomidae	Chalcidoidea			Centaurea jacea
2016.638		6					Chalcidoidea			Arctium lappa
2016.639	1	1			X	Braconidae	Ichneumonoidea			Cirsium arvense
2016.639		1			Y	Braconidae	Chalcidoidea			Cirsium arvense
2016.639		1					Chalcidoidea			Cirsium arvense
2016.642	3	6					Chalcidoidea			Achillea millefolium
2016.642	2	3				Pteromalidae	Chalcidoidea			Achillea millefolium
2016.649	59					Pteromalidae	Chalcidoidea		incl. Pteromalus	Picris hieracioides
2016.649		3		Pteromalus	temporalis	Pteromalidae	Chalcidoidea			Picris hieracioides
2016.649		2		Pteromalus	intermedius	Pteromalidae	Chalcidoidea			Picris hieracioides
2016.649		35		Pteromalus	egregius	Pteromalidae	Chalcidoidea			Picris hieracioides
2016.649	1	17		Pteromalus	playtphilus	Pteromalidae	Chalcidoidea	cf		Picris hieracioides
2016.654		2				Braconidae	Ichneumonoidea			Centaurea scabiosa
2016.654		1				Perilampidae	Chalcidoidea			Centaurea scabiosa
2016.654	3	8				Eurytomidae	Chalcidoidea			Centaurea scabiosa
2016.654	1						Chalcidoidea			Centaurea scabiosa
2016.654	2			Pteromalus		Pteromalidae	Chalcidoidea			Centaurea scabiosa
2016.655	29	39				Eurytomidae	Chalcidoidea			Achillea millefolium
2016.655	12	25				Torymidae	Chalcidoidea			Achillea millefolium
2016.655	15	158					Chalcidoidea			Achillea millefolium
2016.655	19			Pteromalus		Pteromalidae	Chalcidoidea			Achillea millefolium
2016.655		8		Pteromalus	sequester	Pteromalidae	Chalcidoidea	cf		Achillea millefolium
2016.655		12		Pteromalus	intermedius	Pteromalidae	Chalcidoidea			Achillea millefolium
2016.655		17		Pteromalus	achillei	Pteromalidae	Chalcidoidea			Achillea millefolium
2016.658	1	2				Braconidae	Ichneumonoidea			Senecio alpinus
2016.658		1		Stenomalina	gracilis	Pteromalidae	Chalcidoidea			Senecio alpinus
2016.658		6		Pteromalus	egregius	Pteromalidae	Chalcidoidea			Senecio alpinus
2016.658	2			Pteromalus		Pteromalidae	Chalcidoidea			Senecio alpinus
2016.667	32	78					Chalcidoidea			Carduus defloratus
2016.667		5		Pteromalus	elevatus	Pteromalidae	Chalcidoidea			Carduus defloratus
2016.667	2			Pteromalus		Pteromalidae	Chalcidoidea			Carduus defloratus
2016.668	1			Pteromalus	elatus	Pteromalidae	Chalcidoidea			Crepis pyrenaica
2016.668	1			Pteromalus		Pteromalidae	Chalcidoidea			Crepis pyrenaica
2016.668			1						Lepidoptera larva	Crepis pyrenaica
2016.675			1				Hymenoptera			Hieracium murorum
2016.675	5			Pteromalus		Pteromalidae	Chalcidoidea			Hieracium murorum
2016.675		7		Pteromalus	elatus	Pteromalidae	Chalcidoidea			Hieracium murorum
2016.679	15	18					Chalcidoidea			Centaurea jacea
2016.679	4	4				Eurytomidae	Chalcidoidea			Centaurea jacea
2016.679	12			Pteromalus		Pteromalidae	Chalcidoidea			Centaurea jacea
2016.679		5		Pteromalus	egregius	Pteromalidae	Chalcidoidea			Centaurea jacea
2016.679		4		Pteromalus	albipennis A	Pteromalidae	Chalcidoidea			Centaurea jacea
2016.682		1					Chalcidoidea			Centaurea scabiosa
2016.682		1		Pteromalus	albipennis	Pteromalidae	Chalcidoidea			Centaurea scabiosa
2016.686	2	7					Chalcidoidea			Carduus defloratus
2016.686	1	1		Pteromalus	temporalis	Pteromalidae	Chalcidoidea			Carduus defloratus
